# Supplementary material for: Genome-wide identification, and phylogenetic and expression profiling analyses, of XTH gene families in Brassica rapa L. and Brassica oleracea L
Source: PubMed Central journal article supplement (PMC7656703; doi:10.1186/s12864-020-07153-1), 2020-11-11
Supplement: 12864_2020_7153_MOESM4_ESM.pdf [file 12864_2020_7153_MOESM4_ESM.pdf]

PttXET16A

PttXET16A  
 BraA.XTH9.a  
 BraA.XTH9.b  
 BraA.XTH5.a  
 BraA.XTH5.b  
 BraA.XTH4  
 BraA.XTH8  
 BraA.XTH7  
 BraA.XTH6  
 BraA.XTH22.c  
 BraA.XTH22.d  
 BraA.XTH22.a  
 BraA.XTH22.b  
 BraA.XTH23.a  
 BraA.XTH23.b  
 BraA.XTH24.a  
 BraA.XTH24.b  
 BraA.XTH24.c  
 BraA.XTH17.e  
 BraA.XTH18  
 BraA.XTH17.b  
 BraA.XTH17.a  
 BraA.XTH17.d  
 BraA.XTH17.c  
 BraA.XTH25.a  
 BraA.XTH25.b  
 BraA.XTH16  
 BraA.XTH15  
 BraA.XTH12.a  
 BraA.XTH12.c  
 BraA.XTH12.b  
 BraA.XTH14.b  
 BraA.XTH14.a  
 BraA.XTH22.e  
 BraA.XTH21  
 BraA.XTH26  
 BraA.XTH10  
 BraA.XTH32.a  
 BraA.XTH32.c  
 BraA.XTH32.b  
 BraA.XTH31.a  
 BraA.XTH31.b  
 BraA.XTH29.a  
 BraA.XTH29.b  
 BraA.XTH30  
 BraA.XTH27.b  
 BraA.XTH27.a  
 BraA.XTH28  
 BraA.XTH33  
 BraA.XTH2.b  
 BraA.XTH2.a  
 BraA.XTH3  
 BraA.XTH11.a  
 BraA.XTH11.b

PttXET16A

$\alpha 1$   $\beta 1$   $\eta 1$   $\beta 2$   $\eta 2$   $\beta 3$   $\beta 4$   $\beta 5$   
 $\alpha 1$   $\beta 1$   $\eta 1$   $\beta 2$   $\eta 2$   $\beta 3$   $\beta 4$   $\beta 5$   
 4q 5q 6q 7q 8q

PttXET16A  
 BraA.XTH9.a  
 BraA.XTH9.b  
 BraA.XTH5.a  
 BraA.XTH5.b  
 BraA.XTH4  
 BraA.XTH8  
 BraA.XTH7  
 BraA.XTH6  
 BraA.XTH22.c  
 BraA.XTH22.d  
 BraA.XTH22.a  
 BraA.XTH22.b  
 BraA.XTH23.a  
 BraA.XTH24.a  
 BraA.XTH24.b  
 BraA.XTH24.c  
 BraA.XTH17.e  
 BraA.XTH18  
 BraA.XTH17.b  
 BraA.XTH17.a  
 BraA.XTH17.d  
 BraA.XTH17.c  
 BraA.XTH25.a  
 BraA.XTH25.b  
 BraA.XTH16  
 BraA.XTH15  
 BraA.XTH12.a  
 BraA.XTH12.c  
 BraA.XTH12.b  
 BraA.XTH14.b  
 BraA.XTH14.a  
 BraA.XTH22.e  
 BraA.XTH21  
 BraA.XTH26  
 BraA.XTH10  
 BraA.XTH32.a  
 BraA.XTH32.c  
 BraA.XTH32.b  
 BraA.XTH31.a  
 BraA.XTH31.b  
 BraA.XTH29.a  
 BraA.XTH29.b  
 BraA.XTH30  
 BraA.XTH27.b  
 BraA.XTH27.a  
 BraA.XTH28  
 BraA.XTH33  
 BraA.XTH2.b  
 BraA.XTH2.a  
 BraA.XTH3  
 BraA.XTH11.a  
 BraA.XTH11.b



PttXET16A

β13      η4      η5      β14      TT . . . . . T

190      200      210      220      230      240

PttXET16A FNQFMKLYSLSLWNAADWATRGGLKRTDWSKAPFIASYSRSHFDGDEASVE. . . . . AKFCATQ  
 BraA.XTH9.a KDAQMGVYSSISWNAADWATRGGLVKTDSHAPFIASYSRSHFDGDEASVE. . . . . LSKCNGE  
 BraA.XTH9.b KDAQMGVYSSISWNAADWATRGGLVKTDSHAPFIASYSRSHFDGDEASVE. . . . . LSKCNGE  
 BraA.XTH5.a FNQFMKLYSLSLWNAADWATRGGLKRTDWSKAPFIASYSRSHFDGDEASVS. . . . . AKFCETQ  
 BraA.XTH5.b FNQFMKLYSLSLWNAADWATRGGLKRTDWSKAPFIASYSRSHFDGDEASVN. . . . . AKFCETQ  
 BraA.XTH4 FNQFMKLYSLSLWNAADWATRGGLKRTDWSKAPFIASYSRSHFDGDEASVE. . . . . AKYCATQ  
 BraA.XTH8 NQKPMYLFSSISWNAADWATRGGLKRTDWSKAPFIASYSRSHFDGDEASVE. . . . . FPAVST  
 BraA.XTH7 RFQPMGVYSSLWEADWATRGGLKRTDWSKAPFIASYSRSHFDGDEASVE. . . . . AGCPAN  
 BraA.XTH6 TSQPMGVYSSLWEADWATRGGLKRTDWSKAPFIASYSRSHFDGDEASVE. . . . . TNCPSN  
 BraA.XTH22.c KNOPMRMYSLSLWNAADWATRGGLVKTDSKAPFIASYSRSHFDGDEASVE. . . . . QEAQVWSNGKS  
 BraA.XTH22.d KNOPMRMYSLSLWNAADWATRGGLVKTDSKAPFIASYSRSHFDGDEASVE. . . . . QEAQVWSNGKS  
 BraA.XTH22.a KNOPMRMYSLSLWNAADWATRGGLVKTDSKAPFIASYSRSHFDGDEASVE. . . . . QEAQVWSNGKS  
 BraA.XTH22.b KNRPMRMYSLSLWNAADWATRGGLVKTDSKAPFIASYSRSHFDGDEASVE. . . . . DILWSNGKS  
 BraA.XTH23.a KNOPMRMYSLSLWNAADWATRGGLVKTDSKAPFIASYSRSHFDGDEASVE. . . . . QEAQVWSNGKS  
 BraA.XTH23.b KNOPMRMYSLSLWNAADWATRGGLVKTDSKAPFIASYSRSHFDGDEASVE. . . . . QEAQVWSNGKS  
 BraA.XTH24.a KSKPMRMYSLSLWNAADWATRGGLVKTDSKAPFIASYSRSHFDGDEASVE. . . . . IDGCHSNGRS  
 BraA.XTH24.b KSKPMRMYSLSLWNAADWATRGGLVKTDSKAPFIASYSRSHFDGDEASVE. . . . . IDGCHSNGRS  
 BraA.XTH24.c KSKPMRMYSLSLWNAADWATRGGLVKTDSKAPFIASYSRSHFDGDEASVE. . . . . IDGCHSNGRS  
 BraA.XTH17.e KNOPMRLYASLWEAEHWATRGGLKRTDWSKAPFIASYSRSHFDGDEASVE. . . . . VEGCVWANGKS  
 BraA.XTH18 KKPMPRLYASLWEAEHWATRGGLKRTDWSKAPFIASYSRSHFDGDEASVE. . . . . VEGCVWANGKS  
 BraA.XTH17.b KNOPMRLYASLWEAEHWATRGGLKRTDWSKAPFIASYSRSHFDGDEASVE. . . . . VEGCVWANGKS  
 BraA.XTH17.a KDOPMRYASLWEAEHWATRGGLKRTDWSKAPFIASYSRSHFDGDEASVE. . . . . VEGCVWANGKS  
 BraA.XTH17.d KIQPMRYASLWEAEHWATRGGLKRTDWSKAPFIASYSRSHFDGDEASVE. . . . . VEGCVWANGKS  
 BraA.XTH17.c KSOPMRYASLWEAEHWATRGGLKRTDWSKAPFIASYSRSHFDGDEASVE. . . . . VEGCVWANGKS  
 BraA.XTH25.a KMQPMRLYASLWNAADWATRGGLVKTDSKAPFIASYSRSHFDGDEASVE. . . . . ADAVSYTKGP  
 BraA.XTH25.b KIQPMRLYASLWNAADWATRGGLVKTDSKAPFIASYSRSHFDGDEASVE. . . . . ADAVSYTKGP  
 BraA.XTH15 KNOPMRLYASLWNAADWATRGGLVKTDSKAPFIASYSRSHFDGDEASVE. . . . . AAAQTVSSG  
 BraA.XTH12.a KSOPMKLYSSLWEADWATGGRVKTDTNAPFSAYRSHFDGDEASVE. . . . . DVDCSRTSVW  
 BraA.XTH12.c KSOPMKLYSSLWEADWATGGRVKTDTNAPFSAYRSHFDGDEASVE. . . . . DVDCSRTSVW  
 BraA.XTH12.b KSOPMKLYSSLWEADWATGGRVKTDTNAPFSAYRSHFDGDEASVE. . . . . DVDCSRTSVW  
 BraA.XTH14.b TSQPMKLYSSLWEADWATGGRVKTDTNAPFSAYRSHFDGDEASVE. . . . . DQSAQSRSTNA  
 BraA.XTH14.a TSQPMKLYSSLWEADWATGGRVKTDTNAPFSAYRSHFDGDEASVE. . . . . DQSAQSRSTNA  
 BraA.XTH22.e EKQAMRVHSSLWNGDADWATRGGLVKTDSKAPFIASYSRSHFDGDEASVE. . . . . VQDCDWSAPG  
 BraA.XTH21 KSOPMRMYSLSLWNAADWATRGGLVKTDSKAPFIASYSRSHFDGDEASVE. . . . . SENACIWSIDNGT  
 BraA.XTH26 NKGQMKVFAASLWNAADWATGGRVKTDTNAPFSAYRSHFDGDEASVE. . . . . ARTLWQGPAS  
 BraA.XTH10 RLQPMKLYSSLWEADWATGGRVKTDTNAPFSAYRSHFDGDEASVE. . . . . IDALWKGKNT  
 BraA.XTH32.a LRPMMWLYGSISWNAADWATGGRVKTDTNAPFSAYRSHFDGDEASVE. . . . . AIGCTAYSSARCH  
 BraA.XTH32.c LRPMMWLYGSISWNAADWATGGRVKTDTNAPFSAYRSHFDGDEASVE. . . . . AIGCTAYSSARCH  
 BraA.XTH31.a LRPMMWLYGSISWNAADWATGGRVKTDTNAPFSAYRSHFDGDEASVE. . . . . AIGCTAYSSARCH  
 BraA.XTH31.b TRPMMWLYGSISWNAADWATGGRVKTDTNAPFSAYRSHFDGDEASVE. . . . . LAGCTAEGSSSCT  
 BraA.XTH29.a OKPMSLYATISWNAADWATGGRVKTDTNAPFSAYRSHFDGDEASVE. . . . . LDGCVNVSLSLTTVFRDN  
 BraA.XTH29.b OKPMSLYATISWNAADWATGGRVKTDTNAPFSAYRSHFDGDEASVE. . . . . LDGCVNVSLSLTTVFRDN  
 BraA.XTH30 AKPMSLYATISWNAADWATGGRVKTDTNAPFSAYRSHFDGDEASVE. . . . . LDGCVNVSLSLTTVFRDN  
 BraA.XTH27.b SKPMSLYATISWNAADWATGGRVKTDTNAPFSAYRSHFDGDEASVE. . . . . LDGCVNVSLSLTTVFRDN  
 BraA.XTH27.a SKPMSLYATISWNAADWATGGRVKTDTNAPFSAYRSHFDGDEASVE. . . . . LDGCVNVSLSLTTVFRDN  
 BraA.XTH28 AKPMSLYATISWNAADWATGGRVKTDTNAPFSAYRSHFDGDEASVE. . . . . LDGCVNVSLSLTTVFRDN  
 BraA.XTH2.b PSKPMTLVSSLWNGEAWATGGRVKTDTNAPFSAYRSHFDGDEASVE. . . . . DSGHADGGNI  
 BraA.XTH2.a PSKPMTLVSSLWNGEAWATGGRVKTDTNAPFSAYRSHFDGDEASVE. . . . . DSGHADGGNI  
 BraA.XTH3 PSKPMQVEASLWNGDADWATGGRVKTDTNAPFSAYRSHFDGDEASVE. . . . . DSGHADGGNI  
 BraA.XTH11.a PS. . . . . VQTMFMHG. . . . . SVKNG. . . . . SIQDPKEMPTAEFAQAST. . . . . IDGCVTDFFG  
 BraA.XTH11.b PS. . . . . VQTMFMHG. . . . . SVKNG. . . . . TMVDPMEMSCTAKFQASK. . . . . IDGCVTDFFG

PttXET16A

η6      η7      α2      β15      η8      α3

250      260      270      280      290

PttXET16A GAR. . . . . WWDQKEFSDLDFAFYRRLSWVROKQYTYXNYCHDRSRYPS.MPPEKRRDRI. . . . .  
 BraA.XTH9.a DGRF. . . . . WWDQKEFSDLSLHONHOLIWRANHMIDYCYDAAARFPV.TPLECQHRRHL. . . . .  
 BraA.XTH9.b EGRF. . . . . WWDQKEFSDLSLHONHOLIWRANHMIDYCYDAAARFPV.TPLECQHRRHLIKNYKSL  
 BraA.XTH5.a GKR. . . . . WWDQKEFSDLDAQYKRLKWRKRRTYTYXNYCHDRVRFPP.PPCCRDRDRI. . . . .  
 BraA.XTH5.b GKR. . . . . WWDQKEFSDLDAQYKRLKWRKRRTYTYXNYCHDRVRFPP.PPCCRDRDRI. . . . .  
 BraA.XTH4 GRM. . . . . WWDQNEFRDLDAEQYRRLKWRMKWTYTYXNYCHDRTRFPV.MPACRRDRDV. . . . .  
 BraA.XTH8 TTEN. . . . . WWDQYDAWHLKSKTKMDYAWVQRNLVVYDYCYDREFFPK.MPWCISISPA. . . . .  
 BraA.XTH7 PKN. . . . . WWDQYDAWHLTPVEYRWRVNVYMYDYCYDKSRFPV.PPCKSAGI. . . . .  
 BraA.XTH6 PHN. . . . . WWDQYDAWHLTPVEYRWRVNVYMYDYCYDKSRFPV.PPCKSAGI. . . . .  
 BraA.XTH22.c SGQGT. . . . . TGSWLS. . . . . OELDSTAQERMRVWKNYMYNYCHDTKRFPPQGLPKGF. . . . .  
 BraA.XTH22.d SGQGP. . . . . TGSWLS. . . . . OELDSTAQERMRVWKNYMYNYCHDTKRFPPQGLPKGF. . . . .  
 BraA.XTH22.a SGQGP. . . . . TGSWLS. . . . . OELDSTAQERMRVWKNYMYNYCHDTKRFPPQGLPKGF. . . . .  
 BraA.XTH23.b SKQGT. . . . . TGSWLS. . . . . OELDSTAQERMRVWKNYMYNYCHDTKRFPPQGLPKGF. . . . .  
 BraA.XTH23.a SAQSG. . . . . TGSWLS. . . . . OELDSTAQERMRVWKNYMYNYCHDTKRFPPQGLPKGF. . . . .  
 BraA.XTH23.c SAQSG. . . . . TGSWLS. . . . . OELDSTAQERMRVWKNYMYNYCHDTKRFPPQGLPKGF. . . . .  
 BraA.XTH24.a K. . . . . P. . . . . TSTWYT. . . . . OMDSTSQAARLRVWKNYMYNYCHDTKRFPPQGLPKGF. . . . .  
 BraA.XTH24.b K. . . . . P. . . . . TSTWYT. . . . . OMDSTSQAARLRVWKNYMYNYCHDTKRFPPQGLPKGF. . . . .  
 BraA.XTH24.c R. . . . . P. . . . . TSNWYT. . . . . OMDSTSQAARLRVWKNYMYNYCHDTKRFPPQGLPKGF. . . . .  
 BraA.XTH17.e . . . . . NSPWF. . . . . QKVDLEGEKKMKWAQSKYMYNYCHDKRFPQGLPKGF. . . . .  
 BraA.XTH18 . . . . . NSPWF. . . . . QKVDLEGEKKMKWAQSKYMYNYCHDKRFPQGLPKGF. . . . .  
 BraA.XTH17.b . . . . . NSPWF. . . . . QKVDLEGEKKMKWAQSKYMYNYCHDKRFPQGLPKGF. . . . .  
 BraA.XTH17.a . . . . . NSPWF. . . . . QKVDLEGEKKMKWAQSKYMYNYCHDKRFPQGLPKGF. . . . .  
 BraA.XTH17.c . . . . . NSPWF. . . . . QKVDLEGEKKMKWAQSKYMYNYCHDKRFPQGLPKGF. . . . .  
 BraA.XTH25.a . . . . . NSPWF. . . . . QKVDLEGEKKMKWAQSKYMYNYCHDKRFPQGLPKGF. . . . .  
 BraA.XTH25.b . . . . . NSPWF. . . . . QKVDLEGEKKMKWAQSKYMYNYCHDKRFPQGLPKGF. . . . .  
 BraA.XTH16 FRSTFAD. . . . . GESQVP. . . . . NELNAYGRRRLRVWQYFMIDYCYDLSKRFPPQGLPKGF. . . . .  
 BraA.XTH15 FKTSLS. . . . . SELQTA. . . . . NELNAYGRRRLRVWQYFMIDYCYDLSKRFPPQGLPKGF. . . . .  
 BraA.XTH12.a NAN. . . . . SNSMMW. . . . . TTLNPNQVGOMKVVQDDYMYNYCHDYKRFPPQGLPKGF. . . . .  
 BraA.XTH12.c NAN. . . . . SNSMMW. . . . . TTLNPNQVGOMKVVQDDYMYNYCHDYKRFPPQGLPKGF. . . . .  
 BraA.XTH12.b NAN. . . . . SNSMMW. . . . . TTLNPNQVGOMKVVQDDYMYNYCHDYKRFPPQGLPKGF. . . . .  
 BraA.XTH14.b DAN. . . . . KDSMMW. . . . . TSLNNHQYGOMKVVQDDYMYNYCHDYKRFPPQGLPKGF. . . . .  
 BraA.XTH14.a DGN. . . . . KNSMMW. . . . . TSLNNHQYGOMKVVQDDYMYNYCHDYKRFPPQGLPKGF. . . . .  
 BraA.XTH22.e GPNS. . . . . WLN. . . . . EGDENSRKRLKVVQSNFIYNYCHDKRFPQGLPKGF. . . . .  
 BraA.XTH21 GSSSSSSTSTSEWFSQ. . . . . RMDSSSRKRLKVVQSKFMVYNYCHDKRFPQGLPKGF. . . . .  
 BraA.XTH26 TIK. . . . . SNWWTSPSF. . . . . QLTRSQIDRMQKIRSGFMIDYCYDNTNRFKGVMP. . . . .  
 BraA.XTH10 NN. . . . . ENWNNKNEF. . . . . SLTRVQKRWKQVSKYHLIYCYDYARFHNKLP. . . . .  
 BraA.XTH32.a ASP. . . . . YRS. . . . . GLTRKQYQAMRWWQTHSMVYNYCHDYKRDHSLTPECLR. . . . .  
 BraA.XTH32.c ASP. . . . . YRS. . . . . GLTRKQYQAMRWWQTHSMVYNYCHDYKRDHSLTPECLR. . . . .  
 BraA.XTH32.b ASP. . . . . YRS. . . . . GLTRKQYQAMRWWQTHSMVYNYCHDYKRDHSLTPECLR. . . . .  
 BraA.XTH31.a ASP. . . . . TGN. . . . . RGLSQQQMGAMAWAQRNFLVYNYCHDPKRDHTOTPECL. . . . .  
 BraA.XTH29.a DDL. . . . . LMTSDY. . . . . STISPKQAAAMRRFRFRMYYSYCYDVTVRYAVPPPECVILTAEKDRFRDTRG  
 BraA.XTH29.b DDD. . . . . LMASDY. . . . . STISPKQAAAMRRFRFRMYYSYCYDVTVRYAVPPPECVIVTAEKDRFKDTGR  
 BraA.XTH30 VDF. . . . . LESQYF. . . . . STINSRQAAAMRRFRFRMYYSYCYDVTVRYAVPPPECVIVPAEKDRFKDTGR  
 BraA.XTH27.b ADE. . . . . DIR. . . . . AAQETISPSQRKMGVFRKHMITYSYCYDRNRYKVALPECVVNTTEAKRLRVYDP  
 BraA.XTH27.a ATE. . . . . DIR. . . . . AAQETISPSQRKMGVFRKHMITYSYCYDRNRYKVALPECVVNTTEAKRLRVYDP  
 BraA.XTH28 AEE. . . . . DLR. . . . . LASDITDSQRKMDSLRRKHMITYSYCYDRNRYKVALPECVVNTTEAKRLRVYDP  
 BraA.XTH33 LDP. . . . . VDGQF. . . . . FLLSKNQIAADWARRKLMFYCYDNDKSRKVMPEA. . . . .  
 BraA.XTH2.b GST. . . . . TYWNTIQYSRLSANETTAFFKNVRAKYMIDYCYDKRFPV.PTECRLNO. . . . .  
 BraA.XTH2.a GST. . . . . TYWNTIQYSRLSANETTAFFKNVRAKYMIDYCYDKRFPV.PTECRLNO. . . . .  
 BraA.XTH3 GSS. . . . . NYWNGGKYRLSGYEQIYEHIRKYMIDYCYDRSKYQS.PREGY. . . . .  
 BraA.XTH11.a FGP. . . . . EPFWNRKENWLLSSERKLYMNAARKVYMDYCYDRKLYPE.VPEFMEDQKNVWLSYV  
 BraA.XTH11.b FSL. . . . . EYWNRKENWLLSSERKLYMNAARKVYMDYCYDRKLYPE.VPEFMEDQKNVWLSYV

PttXET16A

PttXET16A .....  
BraA.XTH9.a .....  
BraA.XTH9.b EEP TDEEENDMLDLAPGLTKAARLGCQVIARPELDGVRLAIP SATRNFAVDG FVPEPH  
BraA.XTH5.a .....  
BraA.XTH5.b .....  
BraA.XTH4 .....  
BraA.XTH8 .....  
BraA.XTH7 .....  
BraA.XTH6 .....  
BraA.XTH22.c .....  
BraA.XTH22.d .....  
BraA.XTH22.a .....  
BraA.XTH22.b .....  
BraA.XTH23.a .....  
BraA.XTH23.b .....  
BraA.XTH24.a .....  
BraA.XTH24.b .....  
BraA.XTH24.c .....  
BraA.XTH17.e .....  
BraA.XTH18 .....  
BraA.XTH17.b .....  
BraA.XTH17.a .....  
BraA.XTH17.d .....  
BraA.XTH17.c .....  
BraA.XTH25.a .....  
BraA.XTH25.b .....  
BraA.XTH16 .....  
BraA.XTH15 .....  
BraA.XTH12.a .....  
BraA.XTH12.c .....  
BraA.XTH12.b .....  
BraA.XTH14.b .....  
BraA.XTH14.a .....  
BraA.XTH22.e .....  
BraA.XTH21 IKS .....  
BraA.XTH26 .....  
BraA.XTH10 .....  
BraA.XTH32.a .....  
BraA.XTH32.c .....  
BraA.XTH32.b .....  
BraA.XTH31.a .....  
BraA.XTH31.b .....  
BraA.XTH29.a LKFGGSHTKVHRARKRRRRN.RSTPVVSAEL .....  
BraA.XTH29.b LKFGGS...HRARKRRKRN.RSTPVVSADQ .....  
BraA.XTH30 LKFGGTEARGRRRNRQQRPEIESDPDERRRLLK .....  
BraA.XTH27.b VTFGGIPRRHRYGKHRSSRSRVVGTESI .....  
BraA.XTH27.a VTFGGIPRRHRSGKHRSKRSRTDGTVSI .....  
BraA.XTH28 VTFGGIPRRHRHGKHRSK...SRQSI .....  
BraA.XTH33 .....  
BraA.XTH2.b .....  
BraA.XTH2.a .....  
BraA.XTH3 .....  
BraA.XTH11.a AASKNKKLYL .....  
BraA.XTH11.b .....
