# Supplementary material for: Genome-wide identification, and phylogenetic and expression profiling analyses, of XTH gene families in Brassica rapa L. and Brassica oleracea L
Source: PubMed Central journal article supplement (PMC7656703; doi:10.1186/s12864-020-07153-1), 2020-11-11
Supplement: 12864_2020_7153_MOESM5_ESM.pdf [file 12864_2020_7153_MOESM5_ESM.pdf]

$\eta 6$      $\eta 7$                      $\alpha 2$                      $\beta 15$      $\eta 8$   
 240    250                    260                    270    280  
 PttXET16A    T . . . . . T

```

PttXET16A E . . . . . AKFCATQ . . . . . GARWWDQKEFQD L DAFQYRR L SWV RQK . . . Y T I Y N Y C T D R S R Y
Bo1C.XTH5 N . . . . . AKFCETQ . . . . . GKRWWDQKEFQD L D A Q Q Y K R L K W V R T R . . . Y T I Y N Y C T D R V R F
Bo1C.XTH4 E . . . . . AKYCATQ . . . . . GRMWDQNEFRD L D A E Q Y R R L K W V R M K . . . W T I Y N Y C T D R T R F
Bo1C.XTH7 . . . . . P A G C P A N . . . . . P K N W E G S A Y H Q L T P V E A R S Y R W V R V N . . . H M I Y D Y C T D K S R F
Bo1C.XTH8 P . . . . . F P A C V S T T . . . . . T E N W W D Q Y D A W H L S K T Q K M D Y A W V Q R N . . . L V V Y D Y C T D R E R F
Bo1C.XTH9.b T A . . . . . D L S K C S G E E . . . . . Q R F W W D E P T V S E L S L H Q N H Q L I W V R A N . . . H M I Y D Y C T D A A R F
Bo1C.XTH9.a T T . . . . . D L S K C N G E D . . . . . Q R F W W D E P T V S E L S L H Q N H Q L I W V R A N . . . H M I Y D Y C T D A A R F
Bo1C.XTH13 S . . . . . V W N W V T C N A . . . . . N S N S W M W I T . . . L N P N Q V G Q M K W V Q D D . . . Y M I Y N Y C T D Y K R F
Bo1C.XTH12 S . . . . . V W N W V T C N A . . . . . N S N S W M W I T . . . L N S N Q L G Q M K W V Q D D . . . Y M I Y N Y C T D F K R F
Bo1C.XTH15 G . . . . . C D P K F K T S L S . . . . . D S E L Q T A N E . . . L N A Y G R R R L R W V Q K Y . . . F M I Y N Y C T D L K R F
Bo1C.XTH16 G S S F . . . . . C D P K F R S T F A . . . . . D G E S Q V P N E . . . L N A Y G R R R L R W V Q K Y . . . F M I Y D Y C T D L K R F
Bo1C.XTH20 . . . . . G K S S C P K . . . . . K S H W F T K K . . . L G K G G M N R V K W A Q R K . . . Y M V Y N Y C T D K K R F
Bo1C.XTH17.b . . . . . G K S S C A A . . . . . N S P W Y T Q K . . . L D Q R G M N R V K W A Q R N . . . Y M V Y N Y C T D K K R F
Bo1C.XTH17.a . . . . . G K S S C P A . . . . . N S P W F T Q T . . . L D Q R G I D K M K W A Q S K . . . Y M V Y N Y C T D T K R F
Bo1C.XTH24.b . . . . . G R S S C S S . . . . . T R P T S N W Y T Q Q . . . M D S T S Q A R L R W V Q K N . . . Y M I Y N Y C T D D K R F
Bo1C.XTH24.a . . . . . G R S S C S . . . . . P S S S W Y T Q Q . . . M D A T S Q A R L R W V Q K N . . . Y M I Y N Y C T D D K R F
Bo1C.XTH24.d . . . . . G R S S C T S . . . . . T K P T S N W Y T Q E . . . M D S T S Q A R L R W V Q K N . . . Y M I Y N Y C T D D K R F
Bo1C.XTH24.c . . . . . G R S S C S T . . . . . N K P S S W Y T Q Q . . . M D A T S Q A R L E W V Q K N . . . Y M I Y T Y C T D T E K F
Bo1C.XTH22.a . . . . . G K S S C P D V S K O G T . T G S W L S Q E . . . L D S T A Q E R M R W V Q R N . . . Y M I Y D Y C T D A K R F
Bo1C.XTH23 . . . . . G K S S C S N G S G Q G S G S G S . W L S Q E . . . L D S T G Q E R M R W V Q S N . . . Y V I Y N Y C T D A E R F
Bo1C.XTH25 . . . . . G K S S C P A S . . . . . S P R W F T Q K . . . L D L T A E D K M R V V Q S K . . . F M V Y N Y C T D T K R F
Bo1C.XTH21 D N G T T T T T P . C S P G D S S S S S S . . . . . T S T S E W F S Q R G . . . M D S S S R K V L K W V Q K K . . . F M V Y N Y C T D K K R F
Bo1C.XTH22.b P G . . . . . S N A S C G G G . . . . . G P N S W L N E G . . . I D E N S R K R L K W V E S N . . . F I I Y N Y C T D A K R F
Bo1C.XTH26 P . . . . . V S I K Q C A D P . . . . . T I K S N W M T S P S . . . F S Q L T R T Q L D R M Q K I R S G . . . F M I Y D Y C T D T N R F
Bo1C.XTH11.a M S . . . . . I D K F F G . . . . . L E Y W W N R K E N W E L S S K E R K L Y M N A R K V . . . Y L D Y D Y C T D R K R Y
Bo1C.XTH11.b M S . . . . . I D K F F G . . . . . L E Y W W N R K E N W E L S S K E R K L Y M N A R K V . . . Y L D Y D Y C T D R K R Y
Bo1C.XTH2 . G N . . . . . I N A E A C G S . . . . . T T Y Y W N T I Q Y S R L S A N E T T A F K N V R A K . . . Y V T Y D Y C T D R K R F
Bo1C.XTH32.b S . . . . . A R C H P V S . . . . . A S P Y R S G G . . . L T R Q Q Y Q A M R W V Q T H . . . S M V Y N Y C T D Y K R D
Bo1C.XTH32.c S . . . . . A R C H P L S . . . . . A S P Y R S G G . . . L T R K Q Y Q A M R W V Q T H . . . N M V Y N Y C T D Y K R D
Bo1C.XTH32.a P . . . . . A R C H P V S . . . . . A S P Y R S G G . . . L T R K Q Y Q A M R W V Q T H . . . N M I Y N Y C T D Y K R D
Bo1C.XTH31 S . . . . . S S C T P P S . . . . . A S P M G N R G . . . L S Q Q O M G A M A W A Q R N . . . F L V Y N Y C T D P K R D
Bo1C.XTH27.a I E Q F P . . . . . K C D E G . . . . . A E D I R . A A Q E I S P S Q R V K M G A F F R R K . . . H M I Y S Y C T D R N R Y
Bo1C.XTH27.b I E Q F P . . . . . K C E E R . . . . . A I E Y I R . A A Q E I S P S E R A K M E V F F R R K . . . H M I Y S Y C T D R T R Y
Bo1C.XTH28 I E K V L . . . . . S C Q D G . . . . . A A E D I R . L A S E I T E S O R K K M D S L R R K . . . H M I Y S Y C T D R T R Y
Bo1C.XTH29.a S F P N N N N N T V G Y N Y I N C S A S . . . . . D Q D L M T S D Y S T I S P K Q A A A M R R F R R E R . . . Y M Y Y S Y C T D T V R Y
Bo1C.XTH29.b S L T T L T R D N . . . . . Y N N I N C S A S . . . . . D Q L L M T S D Y S T I S P K Q A A A M R R F R R E R . . . Y M Y Y S Y C T D T V R Y
Bo1C.XTH30.b I Q E V P . . . . . T D C S D S . . . . . V D F L E S Q D Y F S I N S R Q R A S M R R F R R O R . . . F M Y Y S Y C T D T V R Y
Bo1C.XTH30.a I Q E V P . . . . . V D C A D S . . . . . V E F L E S Q D Y S A I N S H Q R A A M R R F R R O K . . . F M Y Y S Y C T D T V R Y
Bo1C.XTH33 G S S T G P G P C T K . . . . . S G S V S S . . . . . L D V D G Q D F A T L S K N Q I A A M D W A R R K . . . L M E Y S Y C T D K S R Y
  
```

$\alpha 3$   
 290

```

PttXET16A P S . M P P E C K R R D R D I . . . . .
Bo1C.XTH5 P V . P P P E C R R D R D I . . . . .
Bo1C.XTH4 P V . M P A E C K R R D R D V . . . . .
Bo1C.XTH7 P V . P P P E C S A G I . . . . .
Bo1C.XTH8 P K . M P W E C S I S P W A . . . . .
Bo1C.XTH9.b P V . T P L E C Q H H R H L . . . . .
Bo1C.XTH9.a P V . T P L E C Q H H R H L . . . . .
Bo1C.XTH13 P Q G L P M E C N L G . . . . .
Bo1C.XTH12 P Q G L P T E C N L G . . . . .
Bo1C.XTH15 P R G F P P E C R R S R V . . . . .
Bo1C.XTH16 P Q G F P P E C R R S R V . . . . .
Bo1C.XTH20 P Q G V P A V C T . . . . .
Bo1C.XTH17.b P K G V P A V C T . . . . .
Bo1C.XTH17.a P K G V P K V C T . . . . .
Bo1C.XTH24.b P Q G I P P R E C A T S A . . . . .
Bo1C.XTH24.a P Q G I P P R E C A T S A . . . . .
Bo1C.XTH24.d P Q G I P P R E C A T R S . . . . .
Bo1C.XTH24.c P Q G V P S E C A T S V . . . . .
Bo1C.XTH22.a P E G L P K E C L A A . . . . .
Bo1C.XTH23 P Q G L P R E C L S A . . . . .
Bo1C.XTH25 P Q G V P K E C N I H . . . . .
Bo1C.XTH21 W Q G L P V E C D A K N N K N K N K N K N I K S . . . . .
Bo1C.XTH22.b R L G L P T E C V V M N . . . . .
Bo1C.XTH26 K G V I P P E C S K R Q F . . . . .
Bo1C.XTH11.a P K . V P Q E C R S Y G . . . . .
Bo1C.XTH11.b P K . V P Q E C R S Y G . . . . .
Bo1C.XTH2 P V . P P T E C R L N Q . . . . .
Bo1C.XTH32.b H S L T P E C W R . . . . .
Bo1C.XTH32.c H S L T P E C G R . . . . .
Bo1C.XTH32.a H S L T P E C L R . . . . .
Bo1C.XTH31 H T Q T P E C . . . . .
Bo1C.XTH27.a K V A L P E C V V I P A E A Q R L R V H D P V T F G G I P R R H R N G K H R S R R S R V V G A E S M L L E Q S R Y N E T Y S O
Bo1C.XTH27.b K V S L P D C V V N P A E A H R L R V D P V T F G G I P R R H R S G K H R S K R S H M D G T E S I . . . . .
Bo1C.XTH28 K V A L P E C V V N P E E A K R L R V D P V T F G G I P H R H G H G K H R S K . . . . . S R Q S I . . . . .
Bo1C.XTH29.a A V P P P E C V I V T A E K D R F R D T G R L K F G G S . . . . . H R A R K R R K R N . . . . . R S T P V V S A D Q . . . . .
Bo1C.XTH29.b A V P P P E C V I L T A E K D R F R D T G R L K F G G S H T K V H R A R K R R R R N . . . . . R S T P V V S A E L . . . . .
Bo1C.XTH30.b P E A P P E C V I V P A E K D R F K D T G R L K F G G T E A R G R R R N H R Q O R P E I E S D P D E R R R L L K . . . . .
Bo1C.XTH30.a P E P P P E C V I V P A E K D R F R D T G R L K F G G T E A R E R R R R N R Q O R P E I E S D P D E R K L L . . . . .
Bo1C.XTH33 K V M P A E C . . . . .
  
```
